# Supplementary material for: Electronic structure, doping effect and topological signature in realistic intermetallics Li3−xNaxM (x= 3, 2, 1, 0; M = N, P, As, Sb, Bi)
Source: Royal Society of Chemistry journal article supplement (doi:10.1039/c9cp06033b), 2020-01-01
Supplement: c9cp06033b1.pdf [file c9cp06033b1.pdf]

*Supplementary Information for*

**Electronic structure, doping effect and topological signature in  
realistic intermetallics  $\text{Li}_{3-x}\text{Na}_x\text{M}$  ( $x=3, 2, 1, 0$ ;  $\text{M}=\text{N}, \text{P}, \text{As}, \text{Sb}, \text{Bi}$ )**

Lei Jin, Xiaoming Zhang,\* Tingli He, Weizhen Meng, Xuefang Dai, and Guodong  
Liu\*

School of Materials Science and Engineering, Hebei University of Technology, Tianjin 300130, China.

E-mail: zhangxiaoming87@hebut.edu.cn; gdliu1978@126.com

## I. Band structure in the $k$ -path perpendicular to $\Gamma$ -A

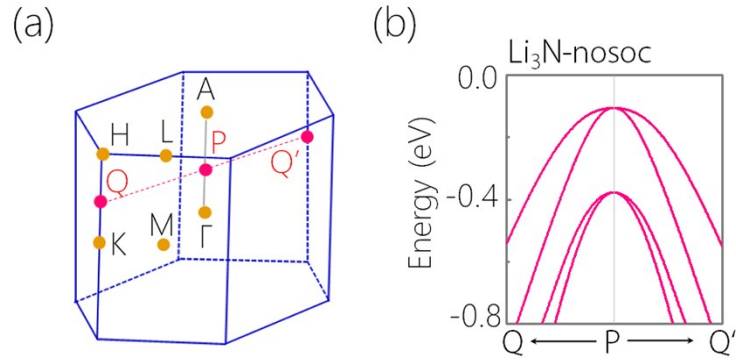

**Figure S1.** (a) The bulk Brillouin zone.  $P$  point locates on  $\Gamma$ - $A$  high-symmetry line.  $Q$  and  $Q'$  are two points in the (100) direction. (b) Enlarged view of band structure of Li<sub>3</sub>N along the  $Q$ - $P$ - $Q'$  path. It shows the band dispersion in the (100) direction around the NL.

## II. Band structures under HSE06 potential

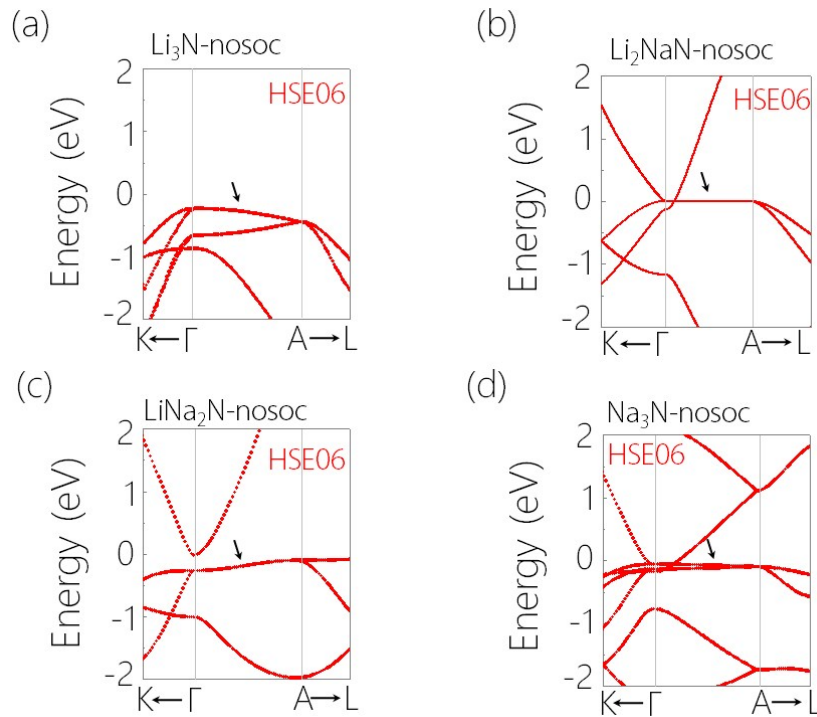

**Figure S2.** Electronic band structures of (a) Li<sub>3</sub>N, (b) Li<sub>2</sub>NaN, (c) LiNa<sub>2</sub>N and (d) Na<sub>3</sub>N by HSE06 hybrid functional. The arrows point out the NLs.

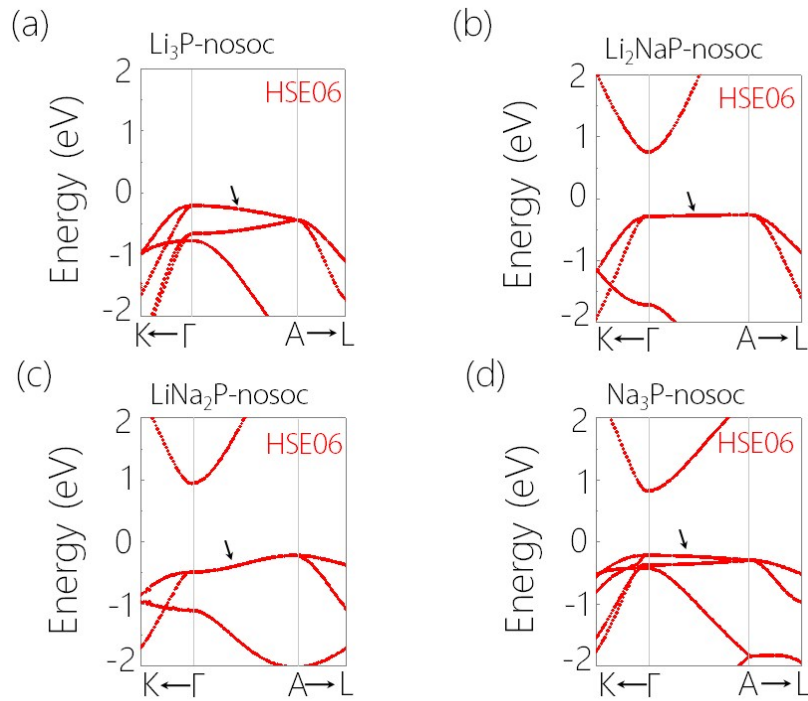

**Figure S3.** Electronic band structures of (a)  $\text{Li}_3\text{P}$ , (b)  $\text{Li}_2\text{NaP}$ , (c)  $\text{LiNa}_2\text{P}$  and (d)  $\text{Na}_3\text{P}$  by HSE06 hybrid functional. The arrows point out the NLs.

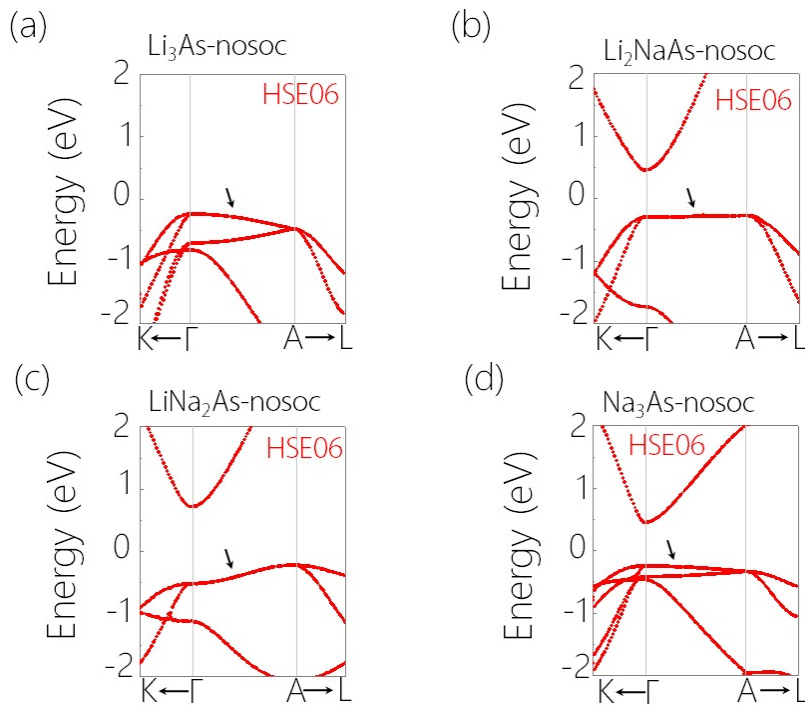

**Figure S4.** Electronic band structures of (a)  $\text{Li}_3\text{As}$ , (b)  $\text{Li}_2\text{NaAs}$ , (c)  $\text{LiNa}_2\text{As}$  and (d)  $\text{Na}_3\text{As}$  by HSE06 hybrid functional. The arrows point out the NLs.

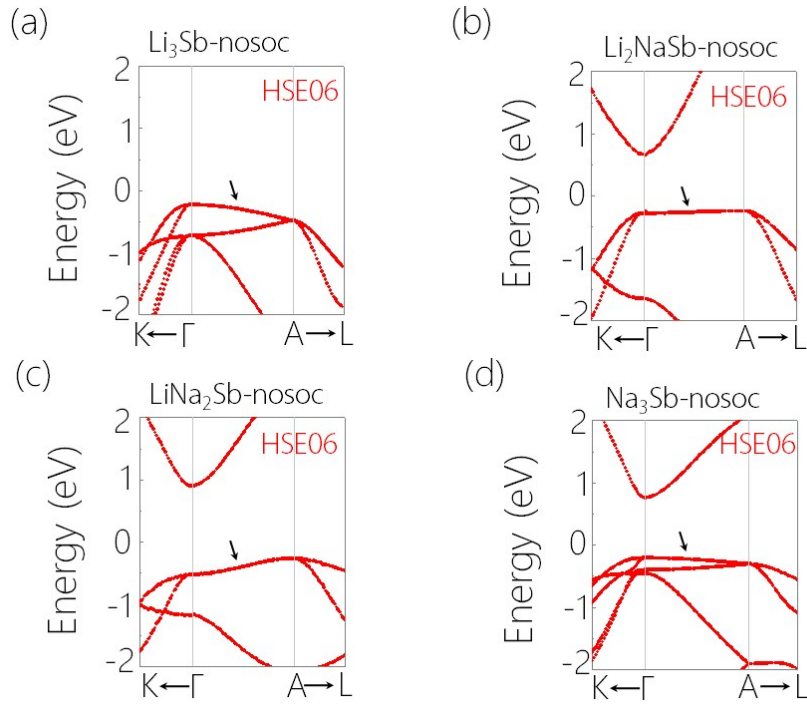

**Figure S5.** Electronic band structures of (a)  $\text{Li}_3\text{Sb}$ , (b)  $\text{Li}_2\text{NaSb}$ , (c)  $\text{LiNa}_2\text{Sb}$  and (d)  $\text{Na}_3\text{Sb}$  by HSE06 hybrid functional. The arrows point out the NLs.

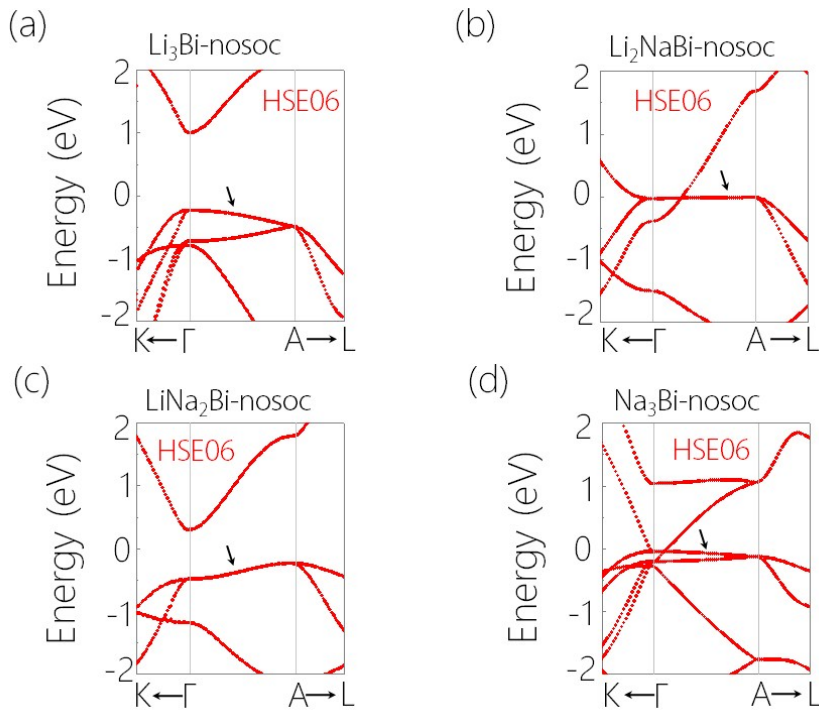

**Figure S6.** Electronic band structures of (a)  $\text{Li}_3\text{Bi}$ , (b)  $\text{Li}_2\text{NaBi}$ , (c)  $\text{LiNa}_2\text{Bi}$  and (d)  $\text{Na}_3\text{Bi}$  by HSE06 hybrid functional. The arrows point out the NLs.
